# Supplementary material for: Genome Sequence Analysis of the Oleaginous Yeast, Rhodotorula diobovata, and Comparison of the Carotenogenic and Oleaginous Pathway Genes and Gene Products with Other Oleaginous Yeasts
Source: MDPI journal article supplement (doi:10.3390/jof7040320), 2021-04-20
Supplement: s1 [file s1]

## Supplementary Data

Genome sequence analysis of the oleaginous yeast, *Rhodotorula diobovata*, and comparison of the carotenogenic and oleaginous pathway genes and gene products with other oleaginous yeasts.

Irene Fakankun<sup>1</sup>, Brian Fristensky<sup>2</sup>, David B. Levin<sup>1\*</sup>

<sup>1</sup>Department of Biosystems Engineering and <sup>2</sup>Department of Plant Science,  
University of Manitoba, Winnipeg, Manitoba, Canada, R3T 2N2

\* Corresponding Author: Tel: 204-474-7429; Fax: 204-474-7512; E-mail: david.levin@umanitoba.ca

Irene Fakankun: [fakankui@mymanitoba.ca](mailto:fakankui@mymanitoba.ca)

Brian Fristensky: [brian.fristensky@umanitoba.ca](mailto:brian.fristensky@umanitoba.ca)

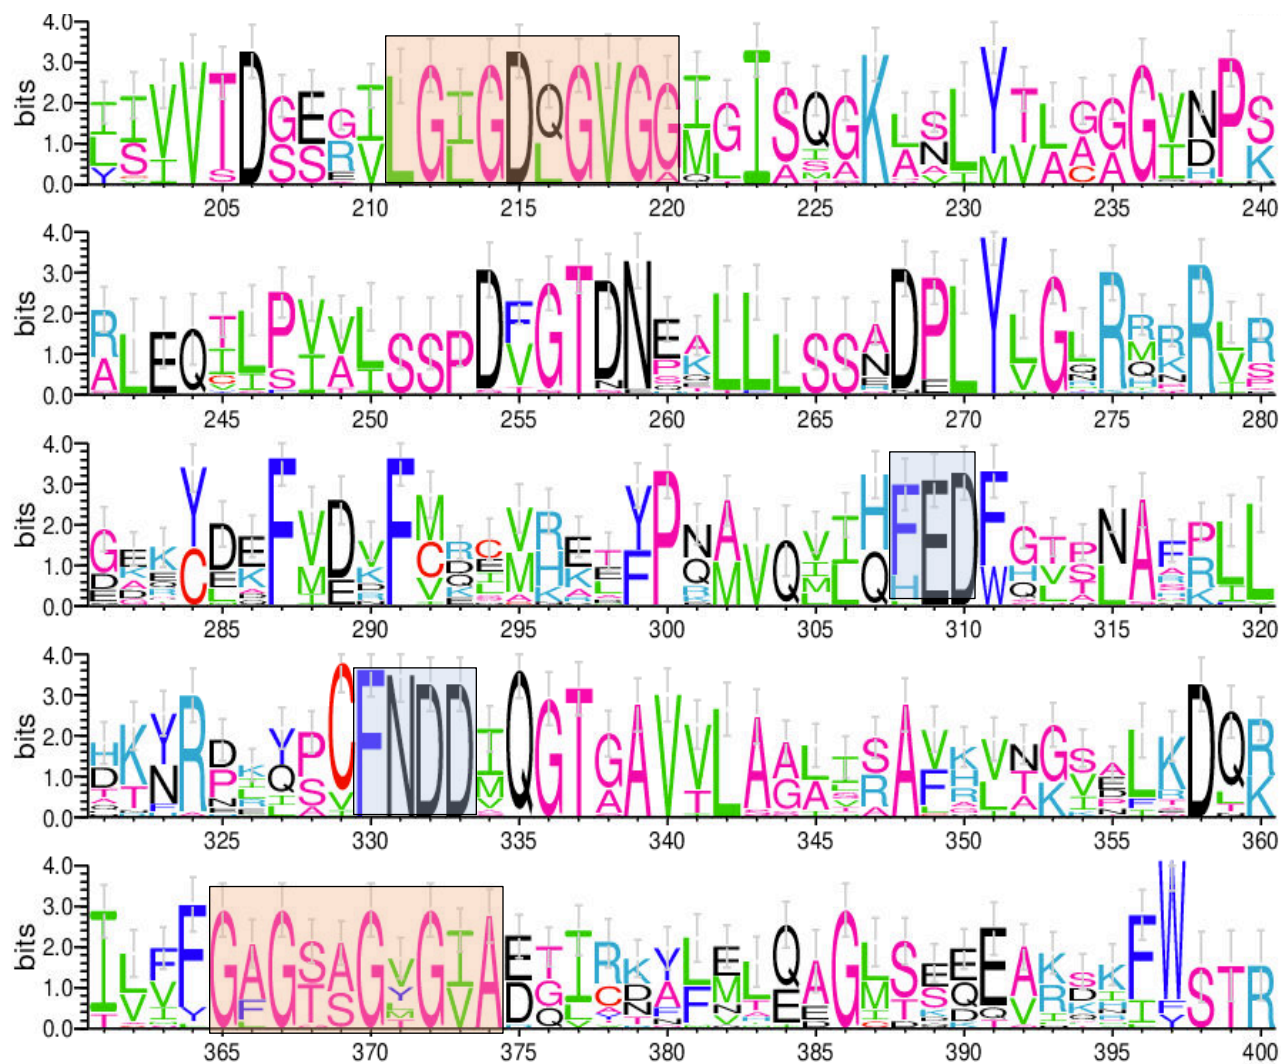

**Figure S1.** Weblogo plot of aligned sequences from *Rhodotorula diobovata*, *Lipomyces starkeyi*, *Rhodotorula toruloides* NP11, *Rhodotorula graminis* WP1, *Rhodotorula sp. JG-1b*, *Sporidiobolus salmonicolor*, *Phaffia rhodozyma*, *Yarrowia lipolytica*, and *Rhodotorula taiwanensis*. Plot shows relative frequency of each amino acid at each position. Red highlighted boxes show the dinucleotide binding sites while the blue boxes show the divalent ion binding sites.

|           | 290                                                                   | 300                                      | 310 | 320 | 330 | 340 | 350 |
|-----------|-----------------------------------------------------------------------|------------------------------------------|-----|-----|-----|-----|-----|
|           | gxxxydxFvdxFxxxxxxyPxa--xihfEDfxxxnaxllxkxrxxxpcFNDDiQGTgAVvLaxxxxAxx |                                          |     |     |     |     |     |
| ADI76993  | .gr..k...d.vqcvkkl..r...vl....                                        | .glp..rr..dt.y.prla.....v.....t..alss.vr |     |     |     |     |     |
| ODQ72042  | .gr..k...d.vqcvkkl..r...vl....                                        | .glp..rr..dt.y.prla.....v.....t..alss.vr |     |     |     |     |     |
| ADK56109  | .gr..k...d.vqcvkkl..r...vl....                                        | .glp..rr..dt.y.prla.....v.....t..alss.vr |     |     |     |     |     |
| AOW05618  | .kq..d.i.n.vqsarrl..k...v.....                                        | .gla..hki.d.y.pei.....t..sita.lk         |     |     |     |     |     |
| XP_504112 | .kq..d.i.n.vqsarrl..k...v.....                                        | .gla..hki.d.y.pei.....t..sita.lk         |     |     |     |     |     |
| BBE10583  | .ae..k...r.celvree..q...ll....                                        | .gvs..aki.tty.nkqsv....m...a.....alls.vk |     |     |     |     |     |
| CDR37260  | .ae..k...r.celvree..q...ll....                                        | .gvs..ski.tty.nkqsv....m...a.....alls.vk |     |     |     |     |     |
| PRQ74895  | .ae..k...r.celvree..q...ll....                                        | .gvs..ski.tty.nkqsv....m...a.....alls.vk |     |     |     |     |     |
| KWU45829  | .ka..e..ek.cddivred..q...ml....                                       | .gvs..ar..a.y.pigs....m...a.....alis.vk  |     |     |     |     |     |
| POY70860  | .kq..e..ek.cddivred..q...ml....                                       | .gvs..ar..a.y.pigs....m...a.....alvs.vk  |     |     |     |     |     |
| KPV76802  | .ek..q...k.cddivrea..q...ml....                                       | .avd..sr..q.f.pkqs....s...a.....alvs.vk  |     |     |     |     |     |
| TNY24152  | .ek..q...k.cddivrge..q...ml....                                       | .ssa.smrfd.y.hkqsi....a...s.....alas.vg  |     |     |     |     |     |
| CEQ39123  | .ae..a...k.cdlvrem..q...ml....                                        | .gvs..gr..n.f.pkqs....m...a.....salvs.cr |     |     |     |     |     |
| CED85069  | .ki..e.i.k.iknckalf.d...l....                                         | .gls..qr..d.yadei.....t.salma.vg         |     |     |     |     |     |
| ANJ02849  | eekcle.m.v.mrcmhetf.nm..v.qh..                                        | wgtpl.fp..h.n.dly.....gair.fh            |     |     |     |     |     |
| PRQ75739  | eekcle.m.v.mrcmhetf.nmvqv.qh..                                        | wgtpl.fp..h.n.dly.....gair.fh            |     |     |     |     |     |
| CDR45495  | gekcle.mev.mrcmhetf.nm..v.qh..                                        | wgtpl.fp..h.n.dly.....gair.fh            |     |     |     |     |     |
| EGU11086  | eekcle.m.v.mrcmhetf.nm..v.qh..                                        | wgtpl.fp..h.n.dly.....gair.fh            |     |     |     |     |     |
| GEM12284  | edkcme.mev.mremhktf.nm..v.qh..                                        | wgtpl.fp..hrn.dly.....gair.fh            |     |     |     |     |     |
| KWU43902  | ddkcee...v.mkemhatf.nm..i.g...                                        | httl.fp..q.n.dvy.....gair.fh             |     |     |     |     |     |
| POY76220  | dedcek..ev.mkemhatf.nm..i.g...                                        | httl.fp..hnn.eiy.....i.gair.fr           |     |     |     |     |     |
| KPV73817  | ddkcee.mev.mremhkef.nm..i.g...                                        | whttl.fp..h.n.diy.....gair.fa            |     |     |     |     |     |
| TNY17208  | ddkcee.m.v.mremhkef.nm..i.g...                                        | whttl.fp..h.n.diy.....gair.fa            |     |     |     |     |     |
| CEQ41698  | detcea...v.mkamnkaf.nm..i.g...                                        | httl.fp..e.h.ery.....gair.fg             |     |     |     |     |     |

**Figure S2.** MAFFT alignment of malic enzymes showing the divalent ion binding sites [Borsch and Westhoff, 1990]. Identical amino acid residues in all the enzymes are signified by a dot (.). ADI76993, *Lipomyces starkeyi*; ODQ72042, *Lipomyces starkeyi* NRRL Y-11557; ADK56109, *Lipomyces starkeyi*; AOW05618, *Yarrowia lipolytica* CLIB89(W29); XP\_504112, *Yarrowia lipolytica* CLIB122; BBE10583, *Rhodotorula toruloides* NBRC10032; CDR37260, *Rhodotorula toruloides* CECT1137; PRQ74895, *Rhodotorula toruloides* NBRC0880; KWU45829, *Rhodotorula sp. JG-1b*; POY70860, *Rhodotorula taiwanensis*; KPV76802, *Rhodotorula graminis* WP1; TNY24152, *Rhodotorula diobovata*; CEQ39123, *Sporidiobolus salmonicolor*; CED85069, *Xanthophyllomyces dendrorhous*; ANJ02849, *Rhodotorula toruloides* IFO0880; PRQ75739, *Rhodotorula toruloides* NBRC0880; CDR45495, *Rhodotorula toruloides* CECT1137; EGU11086, *Rhodotorula toruloides* ATCC 204091; GEM12284, *Rhodotorula toruloides* NBRC10032; KWU43902, *Rhodotorula sp. JG-1b*; POY76220, *Rhodotorula taiwanensis*; KPV73817, *Rhodotorula graminis* WP1; TNY17208, *Rhodotorula diobovata*; CEQ41698, *Sporidiobolus salmonicolor*.

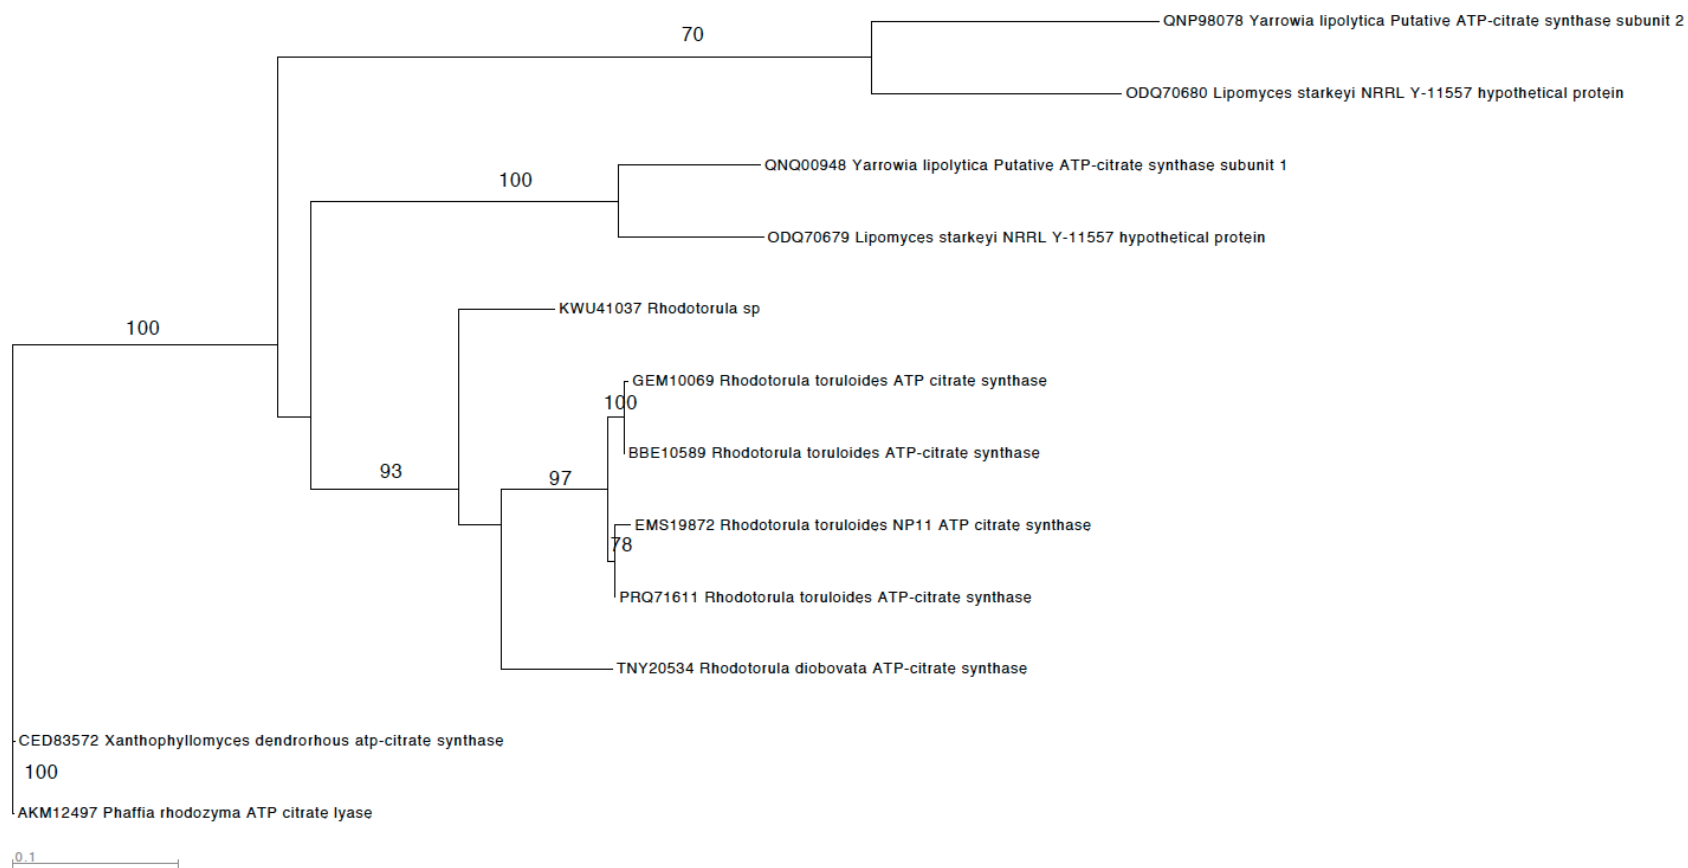

**Figure S3.** PROML phylogenetic tree constructed from an alignment of ATP: Citrate lyase sequences from *Rhodotorula sp.*, *Yarrowia*, *Lipomyces*, and *Xanthophyllomyces*. Analysis shows the relationship between the two ACL subunits of *Y. lipolytica* and *L. starkeyi*. The significant nodes on the tree with bootstrap support values > 70% are highlighted.

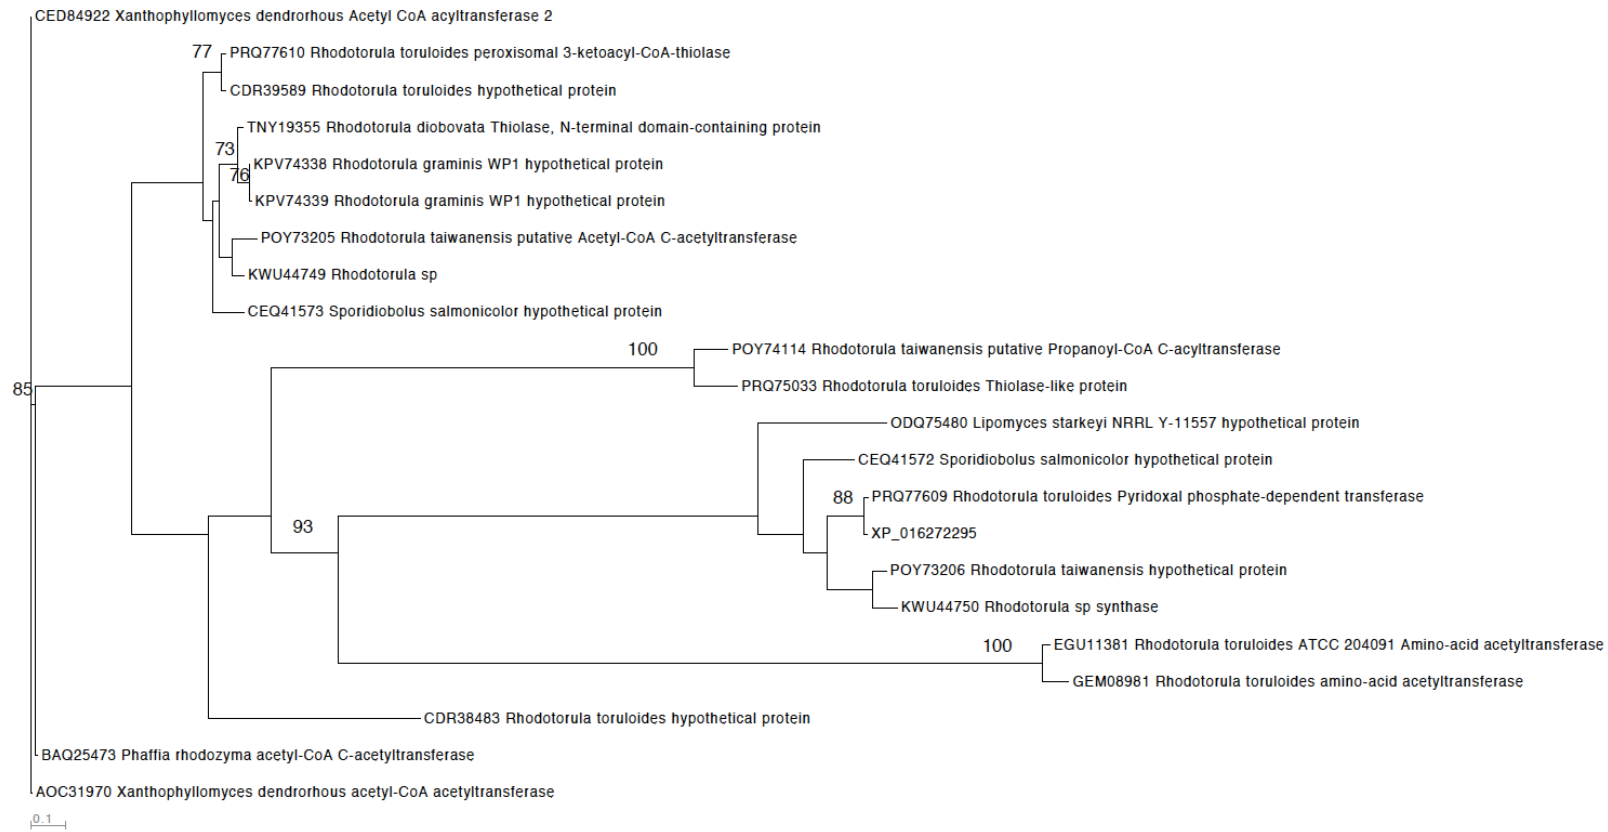

**Figure S4.** PROML phylogenetic tree constructed from a MAFFT alignment of Acetyl-CoA C-acetyltransferase sequences from *Rhodotorula* species, *Yarrowia*, *Lipomyces*, *Sporidobolus* and *Xanthophyllomyces*. The significant nodes on the tree with bootstrap support values > 70% are highlighted.

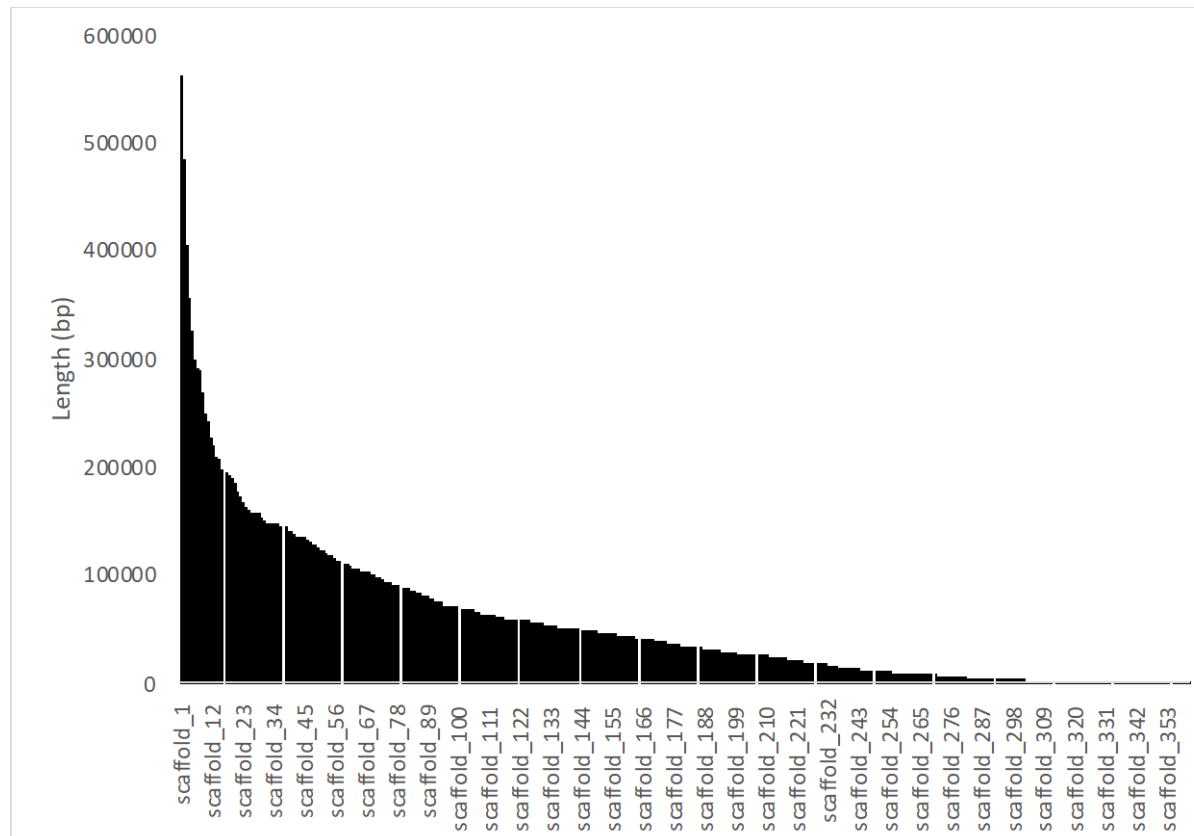

**Figure S5.** Scaffold length distribution of all 361 scaffolds from the *de novo* assembly of *Rhodotorula diobovata* 08-225.

**Table S1.** Scaffold length distribution for the 361 scaffolds used to assemble the *Rhodotorula diobovata* genome.

| Scaffold    | Length | Scaffold    | Length | Scaffold     | Length | Scaffold     | Length | Scaffold     | Length | Scaffold     | Length | Scaffold     | Length | Scaffold     | Length |
|-------------|--------|-------------|--------|--------------|--------|--------------|--------|--------------|--------|--------------|--------|--------------|--------|--------------|--------|
| scaffold_1  | 563716 | scaffold_51 | 124031 | scaffold_101 | 70207  | scaffold_151 | 47520  | scaffold_201 | 27893  | scaffold_251 | 12278  | scaffold_301 | 3813   | scaffold_351 | 1315   |
| scaffold_2  | 485998 | scaffold_52 | 122682 | scaffold_102 | 69632  | scaffold_152 | 47110  | scaffold_202 | 27855  | scaffold_252 | 12155  | scaffold_302 | 3579   | scaffold_352 | 1288   |
| scaffold_3  | 407501 | scaffold_53 | 122072 | scaffold_103 | 69347  | scaffold_153 | 46676  | scaffold_203 | 27588  | scaffold_253 | 11161  | scaffold_303 | 3478   | scaffold_353 | 1262   |
| scaffold_4  | 356559 | scaffold_54 | 120034 | scaffold_104 | 69211  | scaffold_154 | 46507  | scaffold_204 | 27584  | scaffold_254 | 11093  | scaffold_304 | 3335   | scaffold_354 | 1196   |
| scaffold_5  | 328106 | scaffold_55 | 118648 | scaffold_105 | 68795  | scaffold_155 | 45997  | scaffold_205 | 27231  | scaffold_255 | 10956  | scaffold_305 | 3331   | scaffold_355 | 1182   |
| scaffold_6  | 300363 | scaffold_56 | 115626 | scaffold_106 | 67249  | scaffold_156 | 45708  | scaffold_206 | 27201  | scaffold_256 | 10836  | scaffold_306 | 3278   | scaffold_356 | 1148   |
| scaffold_7  | 293503 | scaffold_57 | 114464 | scaffold_107 | 66952  | scaffold_157 | 45575  | scaffold_207 | 27151  | scaffold_257 | 10701  | scaffold_307 | 3271   | scaffold_357 | 1139   |
| scaffold_8  | 290717 | scaffold_58 | 112899 | scaffold_108 | 65288  | scaffold_158 | 44317  | scaffold_208 | 27066  | scaffold_258 | 10544  | scaffold_308 | 3211   | scaffold_358 | 1128   |
| scaffold_9  | 271387 | scaffold_59 | 111718 | scaffold_109 | 64973  | scaffold_159 | 44249  | scaffold_209 | 26740  | scaffold_259 | 10276  | scaffold_309 | 3102   | scaffold_359 | 1120   |
| scaffold_10 | 249850 | scaffold_60 | 110819 | scaffold_110 | 64231  | scaffold_160 | 44153  | scaffold_210 | 25954  | scaffold_260 | 10268  | scaffold_310 | 3078   | scaffold_360 | 1075   |
| scaffold_11 | 243259 | scaffold_61 | 108476 | scaffold_111 | 64191  | scaffold_161 | 44053  | scaffold_211 | 25607  | scaffold_261 | 10259  | scaffold_311 | 3070   | scaffold_361 | 1004   |
| scaffold_12 | 226979 | scaffold_62 | 107663 | scaffold_112 | 63824  | scaffold_162 | 43711  | scaffold_212 | 25160  | scaffold_262 | 10071  | scaffold_312 | 3057   |              |        |
| scaffold_13 | 221070 | scaffold_63 | 106344 | scaffold_113 | 63298  | scaffold_163 | 43639  | scaffold_213 | 25044  | scaffold_263 | 9990   | scaffold_313 | 3033   |              |        |
| scaffold_14 | 211651 | scaffold_64 | 106129 | scaffold_114 | 62868  | scaffold_164 | 42655  | scaffold_214 | 24880  | scaffold_264 | 9730   | scaffold_314 | 3006   |              |        |
| scaffold_15 | 206970 | scaffold_65 | 104307 | scaffold_115 | 62290  | scaffold_165 | 42332  | scaffold_215 | 24258  | scaffold_265 | 9721   | scaffold_315 | 2936   |              |        |
| scaffold_16 | 199045 | scaffold_66 | 103535 | scaffold_116 | 61395  | scaffold_166 | 41672  | scaffold_216 | 24237  | scaffold_266 | 9686   | scaffold_316 | 2918   |              |        |
| scaffold_17 | 195697 | scaffold_67 | 103456 | scaffold_117 | 60354  | scaffold_167 | 41657  | scaffold_217 | 23663  | scaffold_267 | 9332   | scaffold_317 | 2863   |              |        |
| scaffold_18 | 193384 | scaffold_68 | 102875 | scaffold_118 | 60277  | scaffold_168 | 41460  | scaffold_218 | 23278  | scaffold_268 | 9308   | scaffold_318 | 2831   |              |        |
| scaffold_19 | 190360 | scaffold_69 | 102305 | scaffold_119 | 59913  | scaffold_169 | 41325  | scaffold_219 | 23196  | scaffold_269 | 9255   | scaffold_319 | 2815   |              |        |
| scaffold_20 | 185523 | scaffold_70 | 100411 | scaffold_120 | 59639  | scaffold_170 | 40336  | scaffold_220 | 23024  | scaffold_270 | 8581   | scaffold_320 | 2791   |              |        |
| scaffold_21 | 178835 | scaffold_71 | 100164 | scaffold_121 | 59502  | scaffold_171 | 40183  | scaffold_221 | 22963  | scaffold_271 | 8234   | scaffold_321 | 2619   |              |        |
| scaffold_22 | 173499 | scaffold_72 | 98624  | scaffold_122 | 59183  | scaffold_172 | 38870  | scaffold_222 | 22185  | scaffold_272 | 8062   | scaffold_322 | 2561   |              |        |

|              |        |             |       |               |       |               |       |              |       |              |      |               |      |
|--------------|--------|-------------|-------|---------------|-------|---------------|-------|--------------|-------|--------------|------|---------------|------|
| scaffold_2_3 | 169270 | scaffold_73 | 96503 | scaffold_12_3 | 59093 | scaffold_17_3 | 38656 | scaffold_223 | 21937 | scaffold_273 | 7848 | scaffold_3_23 | 2561 |
| scaffold_2_4 | 163365 | scaffold_74 | 95059 | scaffold_12_4 | 59047 | scaffold_17_4 | 38429 | scaffold_224 | 19985 | scaffold_274 | 7662 | scaffold_3_24 | 2541 |
| scaffold_2_5 | 161871 | scaffold_75 | 94951 | scaffold_12_5 | 58310 | scaffold_17_5 | 38188 | scaffold_225 | 19640 | scaffold_275 | 7603 | scaffold_3_25 | 2455 |
| scaffold_2_6 | 159488 | scaffold_76 | 94947 | scaffold_12_6 | 57999 | scaffold_17_6 | 37859 | scaffold_226 | 19609 | scaffold_276 | 7573 | scaffold_3_26 | 2398 |
| scaffold_2_7 | 159370 | scaffold_77 | 92703 | scaffold_12_7 | 57994 | scaffold_17_7 | 37811 | scaffold_227 | 19541 | scaffold_277 | 7182 | scaffold_3_27 | 2354 |
| scaffold_2_8 | 159096 | scaffold_78 | 92176 | scaffold_12_8 | 57347 | scaffold_17_8 | 37429 | scaffold_228 | 19450 | scaffold_278 | 7022 | scaffold_3_28 | 2332 |
| scaffold_2_9 | 158621 | scaffold_79 | 91617 | scaffold_12_9 | 56638 | scaffold_17_9 | 36516 | scaffold_229 | 19432 | scaffold_279 | 6981 | scaffold_3_29 | 2307 |
| scaffold_3_0 | 153256 | scaffold_80 | 88545 | scaffold_13_0 | 56506 | scaffold_18_0 | 35512 | scaffold_230 | 18937 | scaffold_280 | 6597 | scaffold_3_30 | 2306 |
| scaffold_3_1 | 150981 | scaffold_81 | 88281 | scaffold_13_1 | 55444 | scaffold_18_1 | 35373 | scaffold_231 | 18664 | scaffold_281 | 6112 | scaffold_3_31 | 2136 |
| scaffold_3_2 | 148907 | scaffold_82 | 88211 | scaffold_13_2 | 55156 | scaffold_18_2 | 35306 | scaffold_232 | 18241 | scaffold_282 | 6002 | scaffold_3_32 | 2134 |
| scaffold_3_3 | 148760 | scaffold_83 | 87649 | scaffold_13_3 | 55140 | scaffold_18_3 | 35020 | scaffold_233 | 17528 | scaffold_283 | 5847 | scaffold_3_33 | 2110 |
| scaffold_3_4 | 148594 | scaffold_84 | 86773 | scaffold_13_4 | 54795 | scaffold_18_4 | 34800 | scaffold_234 | 16884 | scaffold_284 | 5792 | scaffold_3_34 | 2046 |
| scaffold_3_5 | 148281 | scaffold_85 | 83878 | scaffold_13_5 | 54361 | scaffold_18_5 | 34598 | scaffold_235 | 16141 | scaffold_285 | 5677 | scaffold_3_35 | 2024 |
| scaffold_3_6 | 148251 | scaffold_86 | 83170 | scaffold_13_6 | 52756 | scaffold_18_6 | 34189 | scaffold_236 | 15173 | scaffold_286 | 5612 | scaffold_3_36 | 2016 |
| scaffold_3_7 | 145750 | scaffold_87 | 82556 | scaffold_13_7 | 52428 | scaffold_18_7 | 32948 | scaffold_237 | 14969 | scaffold_287 | 5555 | scaffold_3_37 | 1955 |
| scaffold_3_8 | 145744 | scaffold_88 | 82150 | scaffold_13_8 | 52202 | scaffold_18_8 | 32887 | scaffold_238 | 14778 | scaffold_288 | 5488 | scaffold_3_38 | 1920 |
| scaffold_3_9 | 142015 | scaffold_89 | 82131 | scaffold_13_9 | 52179 | scaffold_18_9 | 32159 | scaffold_239 | 14566 | scaffold_289 | 5348 | scaffold_3_39 | 1893 |
| scaffold_4_0 | 140972 | scaffold_90 | 78598 | scaffold_14_0 | 52053 | scaffold_19_0 | 32109 | scaffold_240 | 14123 | scaffold_290 | 5080 | scaffold_3_40 | 1878 |
| scaffold_4_1 | 138849 | scaffold_91 | 78428 | scaffold_14_1 | 52024 | scaffold_19_1 | 31878 | scaffold_241 | 14118 | scaffold_291 | 4585 | scaffold_3_41 | 1783 |
| scaffold_4_2 | 136445 | scaffold_92 | 76379 | scaffold_14_2 | 50806 | scaffold_19_2 | 31807 | scaffold_242 | 13859 | scaffold_292 | 4585 | scaffold_3_42 | 1733 |
| scaffold_4_3 | 135953 | scaffold_93 | 76331 | scaffold_14_3 | 50753 | scaffold_19_3 | 31432 | scaffold_243 | 13561 | scaffold_293 | 4539 | scaffold_3_43 | 1644 |
| scaffold_4_4 | 135147 | scaffold_94 | 75530 | scaffold_14_4 | 50418 | scaffold_19_4 | 30795 | scaffold_244 | 13431 | scaffold_294 | 4397 | scaffold_3_44 | 1615 |
| scaffold_4_5 | 135023 | scaffold_95 | 72949 | scaffold_14_5 | 50179 | scaffold_19_5 | 30199 | scaffold_245 | 13142 | scaffold_295 | 4396 | scaffold_3_45 | 1560 |
| scaffold_4_6 | 133771 | scaffold_96 | 71833 | scaffold_14_6 | 50109 | scaffold_19_6 | 29853 | scaffold_246 | 13101 | scaffold_296 | 4353 | scaffold_3_46 | 1541 |



|             |        |              |       |              |       |              |       |              |       |              |      |              |      |
|-------------|--------|--------------|-------|--------------|-------|--------------|-------|--------------|-------|--------------|------|--------------|------|
| scaffold_47 | 130143 | scaffold_97  | 71784 | scaffold_147 | 49962 | scaffold_197 | 29742 | scaffold_247 | 13100 | scaffold_297 | 4278 | scaffold_347 | 1538 |
| scaffold_48 | 128697 | scaffold_98  | 71720 | scaffold_148 | 49783 | scaffold_198 | 29437 | scaffold_248 | 12984 | scaffold_298 | 4261 | scaffold_348 | 1494 |
| scaffold_49 | 128532 | scaffold_99  | 71082 | scaffold_149 | 49600 | scaffold_199 | 28908 | scaffold_249 | 12429 | scaffold_299 | 4090 | scaffold_349 | 1457 |
| scaffold_50 | 125606 | scaffold_100 | 71010 | scaffold_150 | 48167 | scaffold_200 | 27926 | scaffold_250 | 12336 | scaffold_300 | 3987 | scaffold_350 | 1397 |

**Table S2.** Genome coverage calculation for Illumina and Ion Torrent reads.

## GENOME COVERAGE

|                                       |            |             |
|---------------------------------------|------------|-------------|
| Desired coverage (50-fold)            | Illumina   | IT          |
| genome size G                         | 21000000   | 21000000    |
| avg. read size                        | 144        | 305         |
| probability of coverage P             | 0.99       | 0.99        |
| fraction of genome per read f         | 6.86E-06   | 1.45E-05    |
| desired coverage C                    | 50         | 50          |
| 1-fold coverage $\ln(1-P)/\ln(1-f)$   | 671585.016 | 317074.9889 |
| req. reads $N = C[\ln(1-P)/\ln(1-f)]$ | 33579250.8 | 15853749.45 |

### Actual coverage

#### Illumina

| file                                    | format | type | num_seqs    | sum_len    | min_len | avg_len | max_len |
|-----------------------------------------|--------|------|-------------|------------|---------|---------|---------|
| DL300_S1_L001_R1_001.fastq.gz           | FASTQ  | DNA  | 4878013     | 713623894  | 30      | 146.3   | 151     |
| DL300_S1_L001_R2_001.fastq.gz           | FASTQ  | DNA  | 4878013     | 703035995  | 30      | 144.1   | 151     |
| DL400_S2_L001_R1_001.fastq.gz           | FASTQ  | DNA  | 4003821     | 580031498  | 30      | 144.9   | 151     |
| DL400_S2_L001_R2_001.fastq.gz           | FASTQ  | DNA  | 4003821     | 568995556  | 30      | 142.1   | 151     |
| DL700_S3_L001_R1_001.fastq.gz           | FASTQ  | DNA  | 2830249     | 412524162  | 30      | 145.8   | 151     |
| DL700_S3_L001_R2_001.fastq.gz           | FASTQ  | DNA  | 2830249     | 401509203  | 30      | 141.9   | 151     |
| total                                   |        |      | 23424166    | 3379720308 |         |         |         |
| Illumina coverage = total seqs/1-fold C |        |      | 34.87892885 |            |         |         |         |

#### Ion Torrent

| file                              | format | type | num_seqs    | sum_len   | min_len | avg_len | max_len |
|-----------------------------------|--------|------|-------------|-----------|---------|---------|---------|
| Pollux-corrected IT reads         | FASTQ  | DNA  | 2965701     | 904538805 | 25      | 305     | 529     |
| IT coverage = total seqs/1-fold C |        |      | 9.353311058 |           |         |         |         |
| Total Illumina + IT coverage      |        |      | 44.23223991 |           |         |         |         |
